# Ultrasound functional neuroimaging reveals propagation of task-related brain activity in behaving primates

Alexandre Dizeux<sup>1\*</sup>, Marc Gesnik<sup>1</sup>, Harry Ahnine<sup>2</sup>, Kevin Blaize<sup>3</sup>, Fabrice Arcizet<sup>2</sup>, Serge Picaud<sup>3</sup>, José-Alain Sahel<sup>3,4</sup>, Thomas Deffieux<sup>1</sup>, Pierre Pouget<sup>2\*†</sup>, Mickael Tanter<sup>1\*†</sup>

<sup>1</sup> Institut Langevin, ESPCI Paris, PSL Research University, CNRS UMR 7587, INSERM U979, 17 rue Moreau, Paris, France.

<sup>2</sup> Institut du Cerveau et de la Moelle épinière, UMRS 975 INSERM, CNRS 7225, UPMC, Paris, France

<sup>3</sup> Institut de la Vision, Sorbonne Universités UPMC, University of Paris 06, INSERM UMR\_S 968, CNRS UMR 7210, 75012 Paris, France

<sup>4</sup> Department of Ophthalmology, The University of Pittsburgh School of Medicine, Pittsburgh, PA 15213, United States

† these authors are co-last authors.

Corresponding authors:

[alexandre.dizeux@gmail.com](mailto:alexandre.dizeux@gmail.com)

[pierre.pouget@upmc.fr](mailto:pierre.pouget@upmc.fr)

[mickael.tanter@gmail.com](mailto:mickael.tanter@gmail.com)

## ABSTRACT

In recent decades, neuroimaging has played an invaluable role in improving the fundamental understanding of the brain. At the macro scale, neuroimaging modalities such as MRI, EEG, and MEG, exploit a wide field of view to explore the brain as a global network of interacting regions. However, this comes at the price of either limited spatiotemporal resolution or limited sensitivity. At the micro scale, electrophysiology is used to explore the dynamic aspects of neuronal activity with a very high temporal resolution. However, this modality requires a statistical averaging of several tens of single task responses. A large-scale neuroimaging modality of sufficient spatial and temporal resolution and sensitivity to study brain region activation dynamically would open new territories of possibility in neuroscience

We show that neurofunctional ultrasound imaging (fUS) is both able to assess brain activation during single cognitive tasks within superficial and deeper areas of the frontal cortex areas, and image the directional propagation of information within and between these regions. Equipped with an fUS device, two macaque rhesus monkeys were instructed before a stimulus appeared to rest (fixation) or to look towards (saccade) or away (antisaccade) from a stimulus. Our results identified an abrupt transient change in activity for all acquisitions in the supplementary eye field (SEF) when the animals were required to change a rule regarding the task cued by a stimulus. Simultaneous imaging in the anterior cingulate cortex and SEF revealed a time delay in the directional functional connectivity of  $0.27 \pm 0.07$  s and  $0.9 \pm 0.2$  s for animals S and Y, respectively. These results provide initial evidence that recording cerebral hemodynamics over large brain areas at a high spatiotemporal resolution and sensitivity with neurofunctional ultrasound can reveal instantaneous monitoring of endogenous brain signals and behavior.

## INTRODUCTION

Many if not all neuroscientific techniques measuring brain activity present with a compromise between the size of the imaging field, temporal and spatial specificity, sensitivity, and physical constraints on the animal. Electrophysiological, and more recently, two-photon microscopy techniques, now permit the recording of neuronal activity at high sampling rates; however, their field of view is limited by the number of implantable electrodes or light scattering in tissues<sup>1,2</sup>. Several other imaging techniques can be used to detect changes in metabolic activities following neural activities, including perfusion fMRI and contrast fMRI. Blood oxygen level-dependent BOLD contrast imaging fMRI is currently the most widely used fMRI method. Although BOLD fMRI provides only an indirect measure of neuronal activity, there is strong empirical evidence that the BOLD signals are indeed highly correlated with neuronal activities<sup>3</sup>. The signal in perfusion fMRI has also been described as more stable compared to BOLD responses<sup>8</sup>, and leading to better spatial specificity. However, these methods require long acquisition sequences, which limit their use in human or awake behaving animals, and they are less sensitive than BOLD. The relatively weak signal-to-noise ratio of these techniques also remains a serious constraint. This means that multiple trials/conditions must be averaged to statistically analyze the changes in activity, and real-time modulations cannot be unequivocally associated with a given brain region. The latest functional ultrasound imaging techniques (fUS), based on ultrafast Doppler, offer a different way to monitor brain hemodynamics<sup>7,9,10</sup> and functional connectivity<sup>10</sup>. This technique has been successfully applied in rodents to measure CBV with high spatiotemporal resolution and sensitivity, but had never been used in non-human primates.

Another approach is to use ultrafast Doppler (neuro-functional ultrasound), whose signal is directly proportional to the number of moving red blood cells (RBCs) in the sample volume, in other words to the local blood volume<sup>4</sup>. Ultrafast Doppler measures real-time CBV changes down to a typical 5% increase while CBV changes assessed by ultrafast ultrasound typically reach more than 50% increase during stimulus-based or brain endogenous activity in small vessels, resulting in a very high sensitivity. This increase in CBV is present in arterioles as well as in capillaries. The traditional view that CBF is regulated solely by precapillary arterioles has recently been challenged by studies in retinal and cerebellar slices<sup>5</sup>. Kleinfeld and colleagues showed that both the average velocity and density of RBCs are greater at high values of flux than at low values using two-photon laser scanning microscopy to image the motion of RBCs in individual capillaries below the pia mater of the primary somatosensory cortex in rats<sup>6</sup>. Although fUS is not able to resolve individual capillaries, it detects tiny blood flow changes (down to 0.5 mm/s blood flow speed) in individual pixels. Miniaturization of ultrafast ultrasound technology has recently made it possible to extend this whole brain neuroimaging to awake and freely moving rats<sup>7</sup>. However, the instantaneous monitoring of endogenous brain signals during cognition has never been demonstrated, though the interest of using this modality to explore brain network dynamics is clear. The combination of high sensitivity, high spatio-temporal resolution (typically 100  $\mu\text{m}$  and 10 ms), and large field of view (ranging from  $\text{cm}^2$  to tens of  $\text{cm}^2$ ) that fUS offers is key to the dynamic study of endogenous brain signals and patterns during visual tasks that we present here.

In the present study, we provide the first fUS images captured from awake and behaving non-human primates performing complex tasks. The supplementary eye field (SEF) is an area of the dorso-medial frontal cortex active during eye movement tasks<sup>11,12</sup>. Evidence from neural recording and stimulation indicate a role for the SEF in learning arbitrary oculomotor stimulus–response rules<sup>13</sup>, reward or error monitoring<sup>14–16</sup>, encoding object-centered directions for saccades<sup>17</sup>, smooth pursuit<sup>18,19</sup>, self-paced eye movements<sup>20</sup>, unpredictable sequential eye movements<sup>21</sup>, antisaccades<sup>22</sup> and the execution of memory-guided saccade sequences<sup>23</sup>. In humans, only a few studies have attempted to determine the function of the SEF by examining failures in saccadic performance of patients with lesions subsuming this area<sup>24</sup>. The neurons of the anterior cingulate cortex (ACC) in macaque monkeys discharge in response to visual stimuli and during the following saccadic eye movements<sup>25</sup>. Functional imaging in humans has described activation in the

posterior cingulate cortex to be associated with visually guided saccades<sup>26</sup>. Other evidence indicates a role in gaze control for a caudal zone in the anterior cingulate cortex<sup>27</sup>. Saccadic eye movements can be evoked by electrical microstimulation of a region in the upper bank of the cingulate sulcus directly ventral to the SEF, in area 24c<sup>28</sup>. Furthermore, functional brain imaging studies have also reported activation in the anterior cingulate cortex during the production of self-generated saccades guided by arbitrary cues<sup>29</sup>. In this study, we simultaneously recorded fUS images from the SEF and ACC regions in macaques freely performing cognitive tasks. CBV changes induced by the neuronal activity during a single task were recorded, without requiring any statistical averaging over several task repetitions as is the case in fMRI or Electrophysiology. We show the possibility of recording cerebral hemodynamics at a high spatiotemporal resolution (100  $\mu\text{m}$ , 10 ms) and sensitivity with simultaneous monitoring of task-related performance through eye tracking. We first present the details of this experimental framework and ability of fUS imaging to precisely image no task/task transitions (Fig. 1-2). We then demonstrate that fluctuations in CBV changes recorded by fUS during low and high oculomotor control tasks are temporally synchronized with the individual trials (Fig. 3), and we demonstrate that this level of synchronization is correlated with, and even predictive of, the success rate. Finally, we indicate the ability of neuro-functional ultrasound to detect the dynamic propagation of local CBV changes through cortical layers and between the SEF and ACC (Fig. 4).

## **METHODS:**

### **Animal model and behavioral data**

Functional data were acquired from two captive-born macaques (*Maccaca mulatta*) S and Y trained to perform various kinds of visual task (see figure 1c). In the saccade task, the animal has to fix its gaze on the cue object presented on the right or left side of the screen ; in the antisaccade task, it has to fix its gaze on the opposite side from where the cue appeared, and finally for the fixation task (not represented in the figure) it must maintain a steady gaze on the initial cue. Each animal was performing sequentially with baseline (rest phase), fixation, pro-saccade, and anti-saccade trials in a blocked design of 60 seconds each (~ 20 trials/task), and this block was repeated 5 times for each day of acquisition. During data acquisition, the eye position of the primate was monitored at 1 kHz with an infrared video eye tracker (Eyelink 1k, SR-Research), which enabled live control of the behavioral paradigm and the delivery of a reward based on the success or failure of a visual task. The designation 'behavior signal' refers to an oscillating signal created with a period equal to the time between the start of trials, as shown in Fig. 1.c. This period contains information about the time response of the primate.

### **Implant and probe for fUS imaging in awake behaving monkeys**

The head fixation system was a titanium headpost (Non-dental acrylic implant, Crist Instrument, MD USA). After behavioral training of the animals, a craniotomy of 20 mm by 20 mm above the supplementary region was performed (Medio-Lateral: 0; Antero-Posterior: +26), and an electrophysiological recording chamber was implanted (CILUX chamber, Crist instrument). A custom miniature 15-MHz ultrasound probe (Fig. 1a) (128 elements, 15 MHz, 100x100  $\mu\text{m}^2$  of spatial resolution) with acoustic coupling gel was placed in the chamber.. The acquired images had a pixel size of 100  $\times$  100  $\mu\text{m}$ , a slice thickness of 400  $\mu\text{m}$  and a field of view (FOV) of 14 mm  $\times$  10 mm (Fig. 1a). The FOV of our miniature probe allowed imaging of superficial and deep cortical regions including the SEF and the ACC.

### **Functional ultrasound (fUS)**

We measured CBV variations with an fUS sequence modified from a previously used Power Doppler sequence<sup>30</sup>. As fUS signals are proportional to CBV<sup>9</sup>, we refer to the acquired images as 'CBV images'. Data were acquired by emitting continuous groups of 11 planar ultrasonic waves tilted at angles varying from -10 to 10 degrees using an ultrafast ultrasound research scanner (256 electronic channels, 60 MHz sampling rate). Ultrasonic echoes were summed to create a single compound image acquired every 2 ms. After spatial temporal filtering based on the singular value decomposition of these ultrasonic images<sup>31</sup> for fine discrimination between blood flow and tissue

motion, final Doppler images were created by averaging 125 compound ultrasonic images over a sliding 250 ms window with 10 ms overlaps. At a frame rate of 100-Hz, each 300 s acquisition period generated a final sequence of 30,000 Doppler images.

## Data processing

The SEF was spatially located by mapping activated pixels obtained from computing the normalized correlation coefficient between the local Power Doppler signal obtained from fUS and the temporal block pattern (no rule vs. rule) of the visual stimulus. The power Doppler signal was then averaged within a large region of interest (ROI) (~240 pixels) and a 1-pixel ROI in the SEF and in similar ROIs in a contra-lateral controlled region (Fig. 1a). The reference pixel in the SEF was chosen based on the highest variation of CBV during the recording sequence. A behavior signal was generated to enable CBV fluctuations in the SEF area to be temporally correlated with the behavior of the monkeys. The behavior signal consisted of a sine wave whose period was defined by the delay between trial-start  $t_i$  and the following trial-start  $t_{i+1}$  (see Fig. 1c). The variability in inter-stimulus interval (ISI) from one type of task to another is mainly influenced by the animal response time (RT), as the jitter and the self-paced period remain similar.

The level of brain-behavior synchronization was assessed by computing the correlation of SEF activity with the behavior signal. A linear regression was plotted between the SEF activity (y-axis) and the behavior signal (x-axis) for each visual task block (Fig. 3b), either in the frequency domain (peak frequency) or time domain (mean CBV oscillation period). For all experiments, the correlation between the SEF activity and behavior was plotted against the related success rate (Fig. 3d).

Spectrograms were drawn using the inbuilt MatLab function with a Hamming window of 15% for the overall acquisition time and 80% for overlapped samples (Fig. 3a, Supplementary Fig. 4a – 4d) to study the shift frequency of CBV oscillations in regions of interest during visual tasks.

## RESULTS:

### fUS reveals functional activation of brain areas related to cognitive tasks

We first imaged cue-evoked hemodynamic responses in the SEF of awake behaving primates as they were instructed to start an oculomotor task. Twenty successive trials (fixation, saccade, and antisaccade trials) were performed. We observed the responses using fUS imaging with a 15 MHz ultrasonic array (see Fig. 1a) inserted into the 20x20 mm<sup>2</sup> electrophysiological chamber. The high temporal sampling rate (10 ms) enabled by fUS imaging means that cardiac pulsatility and respiratory motion artifacts occurring at different Doppler frequencies could be unambiguously subtracted from the collected data (Fig. 1b). Correlation maps over all trials between the no-rule and rule trials reveals a strong activation of the SEF region during the rule trials (Fig. 2a). The peak amplitude of the CBV signal increased in the SEF by 31.3% ± 15.2% on average over baseline in a large region of interest (ROI, ~240 pixels) and 84.8% ± 38.7% in a 1-pixel ROI in all 85 recorded sessions. In the large and 1-pixel control regions, the average variation was 8.8% ± 10.9% and 8.7% ± 21.6%, respectively (Fig. 2b).

### fUS could detect a dynamic rule change from the single first trial

The high sensitivity of the technique also allows fast CBV dynamics during rule change from the single first trial to be detected. CBV changes revealed a transient, abrupt, and localized activation of the SEF region at the transition between no rule/rule conditions (Fig. 2a). We quantified this abrupt variation of activity within the first trial of each block condition to assess the ability of cognitive fUS to monitor instruction changes within a 3 s window (Fig. 2a). Within each condition block, we quantified the activity within a single trial to assess the sensitivity of fUS. Brain activation maps of the correlation between the CBV signal and appearance of the cue revealed strong and abrupt significant activation changes in the region of the SEF ( $p < 10^{-10}$ , one-tailed Student's *t*-test; fig. 2a). The CBV signal rapidly reached its maximum after the



onset of the cue and was above 2 standard deviations of the baseline just after  $1.8 \pm 0.5$  s (Fig. 2a).

## Oscillations in fUS signals capture individual task response times and correlate with performance

Beyond correlating CBV changes on a block design basis (rule/no rule conditions), we exploited the temporal resolution and sensitivity of fUS to more finely analyze the CBV variations between individual trials in each fixation, saccade and antisaccade block. CBV changes within each block were found to fluctuate at an instantaneous frequency synchronized with the effective trial repetition frequency. The spectrogram of the CBV signal in the SEF revealed 0.354 Hz, 0.338 Hz, and 0.295 Hz repetition frequencies for fixation, saccade, and anti-saccade tasks, respectively (Fig. 3a, see Supplementary Fig. 4a for control regions). This temporal evolution of CBV estimated for small blocks of 20 successive trials was found to be highly correlated with the average time between trials ( $R^2=0.74$ ,  $p<10^{-4}$ , Fig. 3b) measured by the eye tracking system. We found fUS imaging could inherently capture small changes in task response time between the saccade and antisaccade experiments ( $\delta t = t_{antisacc} - t_{sacc} = 280 \pm 210$  ms for fUS versus  $\delta t = 210 \pm 160$  ms, for average time between trials estimated by the eye tracking system with no significant difference between both approaches:  $p = 0.36$ , Fig. 3c). Furthermore, the degree of synchronization between the inter-trial timings and the CBV responses in the SEF was measured and found to be significantly correlated with the percentage of successful trials ( $R^2=0.63$ ,  $p<10^{-12}$ , Fig. 3d). The estimation of this degree of synchronization during the first 40 seconds (i.e. during the fixation block) was found to predict the future percentage of successful trials ( $R^2 = 0.34$ ,  $p<10^{-5}$ , Fig. 3d) between 60 s and 300 s (i.e. during the saccade and anti-saccade blocks). The synchronization during fixation could thus reveal the attention degree of the animal for a particular session.

## fUS permits access to the directional functional connectivity of cortical layers

We also studied the ability of fUS imaging to provide information on the directional propagation of SEF and ACC information, both within the cortical layers, and between cortical regions. Correlating the time profile of CBV variations in a seed pixel of SEF during the 20 successive trials with all other pixel time profiles revealed that functional connectivity between cortical regions (SEF and ACC) was similar for the fixation, saccade, and antisaccade experiments (Fig. 4a). Analyzing the time profile of the correlation signal versus depth in the cortical structures clearly revealed a top-down propagation of the maximal correlation values in the SEF layers (see supplementary movie 1) in animal Y during the fixation, saccade, and anti-saccade tasks (Fig. 4b, see Supplementary Fig. 6a for animal S). Extracting these signals for pixels located at different depths within the ACC ( $n=8$ ) and SEF ( $n=33$ ) for animal Y exhibited precise propagation timing between upper and lower regions at a  $4.0 \pm 1.2$  mm.s<sup>-1</sup> and  $3.6 \pm 1.3$  mm.s<sup>-1</sup> speed (Fig. 4c). Similar propagation speeds within the ACC ( $n=33$ ) and SEF ( $n=42$ ) were found for animal S ( $5.2 \pm 2.6$  mm.s<sup>-1</sup> and  $8.4 \pm 2.6$  mm.s<sup>-1</sup>, supplementary Fig. 6a).

An average time delay in the directional functional connectivity of  $0.27 \pm 0.07$  s and  $0.9 \pm 0.2$  s was found between the ACC and SEF for animals S and Y (Fig. 4a). These differences were not found to be correlated with success rate or other behavior parameters. For animal Y, some experiments revealed a directional functional connectivity time delay of  $1.6 \pm 0.2$  s going from the SEF to ACC (see Supplementary Fig. 6b). The propagation of SEF-correlated information in one way or the other between the ACC and SEF were found in 30% (8/27) and 79% (33/42) of visual task blocs for animals Y and S, respectively.

## DISCUSSION

In this study we highlighted the benefit of using fUS imaging to monitor activity of the prefrontal cortex (SEF and ACC) of non-human primates at rest or while performing visual tasks (fixation, saccade and antisaccade). Based on event-related variation of CBV amplitude in the SEF, we were able to detect neuronal activity after only a single trial (Fig. 2a, 2b). The high sampling rate (10ms) enabled us to show that CBV oscillation frequency in the SEF during block design sequences was related to the response time (RT) of the animals (Fig. 3b, 3c). Moreover, the level of SEF-behavior synchronization revealed a strong correlation with success rate of animal and this level of synchronization over the first 40 seconds (part of the fixation task) was even predictive of future success rate (Fig. 3d). Finally, computation of lag from seed-based (SEF) correlation highlighted propagation of correlated information from ACC to SEF for both animals.

As shown in figure 2a, it was possible to follow a significant increase of CBV amplitude above the baseline level after a single trial. Due to the very high sensitivity of fUS imaging it was not necessary to average several trials to decrease the noise level. Most cognitive studies using fMRI measure BOLD variations related to task-evoked responses that usually involve averaging across many trials (block design) to improve confidence that BOLD variations are not artefacts. Other techniques can be implemented to lower signal from non-neuronal activity during acquisition by measuring and removing physiological parameters (respiratory and cardiac activity) from the BOLD signal through linear regression<sup>32,33</sup> or by designing an acquisition sequence with a higher sampling rate to avoid aliasing of a higher frequency physiology<sup>34,35</sup>. This can be even done during post-processing using algorithms like independent component analysis<sup>36</sup> (ICA) or by regressing out signals that are common to all voxels<sup>37</sup>. Nevertheless, although event-related approaches in fMRI opened new areas of research in cognitive psychology, complex signal post-processing is still required to counter the limited spatiotemporal resolution and sensitivity of fMRI. Such approaches have been criticized for “[embedding] fMRI analyses within layers of abstraction – pulling researchers ever farther away from their data” as explained by Huette<sup>38</sup>.

The fact that fUS imaging does not require the implementation of any complex signal processing to extract the signal of interest from noise, even in an event-related study in a behaving non-human primate, is an important feature. Indeed, as summarized in supplementary figure 6, the noise level measured by fUS in regions outside of the brain had an amplitude variation of only 4%, ten times lower than the spontaneous coherent CBV fluctuations (40% of variation in amplitude) measured in a cortical region not involved in visual tasks, and twenty times lower than the CBV variations (80% variation from baseline to task) measured in the SEF region. As with event-related study, the recording of spontaneous brain activity in fMRI is challenging because the BOLD signal can be corrupted by, or even caused by, artefacts such as non-neuronal physiological fluctuations. Despite the fact that we did not investigate the relationship between low and high frequency of CBV oscillations in depth, fUS imaging was sensitive enough (supplementary fig. 6) to highlight spontaneous coherent CBV oscillations in behaving animals. Again, as presented in the example of supplementary figure 6, there is a ten-fold difference in amplitude between the noise signal and spontaneous CBV oscillations, and a two-fold difference between the latter and SEF activity.

Finally, fUS imaging was shown to be able to track directional functional connectivity in real time. Such directional functional connectivity has long been sought for by using fMRI. Mitra et al examined the latency structure of spontaneous fluctuations in the fMRI BOLD signal<sup>39</sup>. They revealed that intrinsic activity propagates through and across regions on a timescale of ~0.5 s. They found variations in the latency structure of this activity resulting from sensory state manipulation (eyes open vs. closed), antecedent motor task (button press) performance, and time of day (morning vs. evening) clearly suggesting that BOLD signal lags reflect neuronal processes rather than hemodynamic delay. Their results emphasize the importance of the temporal structure of brain's spontaneous activity. In the quest for the dynamic activation in different cortical layers

(laminae), the ultimate challenge of such laminar directional fMRI is to provide information on the direction of information flow by comparing the relative contributions of different laminae to the signal within a given patch of cortex. However, the rapid signal transmission across the neighboring laminae is an order of magnitude faster than that which fMRI can measure, which potentially jeopardizes the entire endeavor of laminar fMRI<sup>40</sup>. Bypassing this temporal resolution problem, Huber et al. recently proposed another strategy to provide evidence for laminar fMRI using a CBV-weighted fMRI approach and different stimuli paradigms<sup>41</sup>. In this study, we demonstrate that fUS can exploit its superior (by an order of magnitude) temporal resolution to track delays in the directional functional connectivity between the ACC and SEF. Within the SEF region, the propagation of seed-based correlated information was found between different layers, leading to a typical  $210 \pm 70$  ms and  $440 \pm 150$  ms delay between top and lower cortical layers (considering a distance of 1.6 mm), emphasizing the actual limit of fMRI for capturing this directional propagation of information. As timescales of the lag structure are of the order of seconds during task-evoked acquisitions, it could be argued that this is a purely vascular effect, due to conducted or retrograde dilation within blood vessels<sup>42</sup>. However, it is highly plausible that the contribution to the lag structure is here primarily neuronal for several reasons.

Firstly, the propagation of a vascular wave due to vessel vasomotion would completely call into question the ability of fUS imaging to perform local measurements of brain activation. This would contradict the many studies where fUS imaging was reported to detect a localized activation in cortical or deep regions in rats<sup>43,44</sup>, ferrets<sup>45</sup> and humans<sup>46</sup>. In particular, Bimbard et al recently reported the ability of fUS to reconstruct tonotopic maps of cortical and deep structures, such as the inferior colliculus, with a resolution of 100 microns. During auditory stimuli, Bimbard et al reported the ability of fUS imaging to discriminate between the responsiveness of neighboring voxels in ferrets, with a functional resolution as fine as 100  $\mu$ m. Furthermore, fUS imaging was found able to discriminate voxels based on their tuning curves within a distance of 300  $\mu$ m in as little as 10 repetitions per frequency. Importantly, they reported this measurement as a conservative measure of functional resolution, since it largely depends on the smoothness of the underlying functional organization itself (tonotopy) and of the number of trials. The propagation of a pure vascular wave through all cortical layers would contradict these previous studies on the spatial resolution of fUS.

Secondly, it may be objected that the observed lag structure is due to regional variations in the latency of neurovascular coupling<sup>47-49</sup>. Although not completely refutable, this hypothesis is not probable here. The lag structure and propagation speed in the same region of the same animal are markedly different for spontaneous and task-evoked activity, and cannot be explained by regional heterogeneity of the neurovascular coupling. The latency delays observed in fUS imaging during spontaneous activity (hundreds of ms) are an order of magnitude faster than the latency delays measured during task-evoked activity (some seconds) as has already been observed in the literature<sup>50</sup>. Lag structure results observed in fMRI are generally confined to a range of 0.5 s whereas latency in task-evoked responses are on a timescale of the order of several seconds<sup>50</sup>.

Third, and even more importantly, the fast propagation speed of spontaneous activity we have found here is in good agreement with other studies<sup>51-54</sup>. Mohajerani et al demonstrated that a propagation speed (typically 0.2 m/s) can be measured during spontaneous activity using VSD calcium imaging in mice. Their results avoid the question of neurovascular coupling and confirm the neuronal contribution of BOLD measurements in rs-fMRI. Our results are obtained with a blood flow imaging method presenting a temporal resolution ( $\sim 10$  ms) comparable with VSD calcium imaging which tracks neuronal activity. Both approaches yield the same order of magnitude for the propagation speed ( $0.43 \pm 0.26$  m/s and  $0.36 \pm 0.09$  m/s for both primates in fUS compared to 0.2 m/s in VSD calcium imaging<sup>56-57</sup> and 0.4 m/s-6.3 m/s during sleep<sup>53,54</sup>). Importantly, the latency trajectory observed within and between ACC/SEF regions cannot be anatomically explained just by a vascular component propagation. Suppl. Movie 1 clearly exhibits a top-down directional connectivity in the ACC followed by a top-down directional connectivity in the SEF. These results support the models that predict that the ACC is activated earlier during preparatory periods, whereas the PFC monitors for conflict during stimulus processing and response selection<sup>55,56</sup>.

Although these arguments render a neuronal basis for latency structure rather plausible, our fUS data provide only indirect proof. Further studies involving multimodality acquisitions (EEG, biphoton and fUS) should allow us to unambiguously confirm the physiological basis of latency structure. Such neuroimaging of directional functional connectivity at a high temporal resolution offers wide perspectives for whole-brain studies investigating information flow between brain regions. In the present study, the exploration of brain function with fUS imaging was restricted to cortical areas because of the use of a 15 MHz probe, but it is possible to use an ultrasonic probe with lower frequency to record CBV fluctuations in a full slice of non-human primate as shown in supplementary figure 7a. The high spatiotemporal specificity and sensitivity of fUS imaging means that it is well suited for behaving NHP studies and the development of complex experimental paradigms with, for instance, near real-time feedback loops between region activations and the experimental paradigm. Although current fUS imaging technology has some drawbacks compared to MRI—it is currently only 2D and requires a craniotomy—its high sensitivity, resolution and, equally important, its high portability and compatibility with other experimental equipment including electrophysiology<sup>7</sup> make it a compelling tool for innovative and interactive multimodal approaches to behaving studies in the NHP neuroscience field.

### **Acknowledgment**

This work was supported by the European Research Council SYNERGY Grant scheme (HELMHOLTZ, ERC Grant Agreement #610110).



## REFERENCES

1. Kerr, J. N. D. & Nimmerjahn, A. Functional imaging in freely moving animals. *Curr. Opin. Neurobiol.* **22**, 45–53 (2012).
2. Packer, A. M., Russell, L. E., Dalgleish, H. W. P. & Häusser, M. Simultaneous all-optical manipulation and recording of neural circuit activity with cellular resolution in vivo. *Nat. Methods* **12**, 140–146 (2015).
3. Logothetis, N. K. What we can do and what we cannot do with fMRI. *Nature* **453**, 869–878 (2008).
4. Rubin, J. M. *et al.* Normalizing fractional moving blood volume estimates with power Doppler US: defining a stable intravascular point with the cumulative power distribution function. *Radiology* **205**, 757–765 (1997).
5. Peppiatt, C. M., Howarth, C., Mobbs, P. & Attwell, D. Bidirectional control of CNS capillary diameter by pericytes. *Nature* **443**, 700–704 (2006).
6. Kleinfeld, D., Mitra, P. P., Helmchen, F. & Denk, W. Fluctuations and stimulus-induced changes in blood flow observed in individual capillaries in layers 2 through 4 of rat neocortex. *Proc. Natl. Acad. Sci. U. S. A.* **95**, 15741–15746 (1998).
7. Sieu, L.-A. *et al.* EEG and functional ultrasound imaging in mobile rats. *Nat. Methods* **12**, 831–834 (2015).
8. Aguirre, G. K., Detre, J. A., Zarahn, E. & Alsop, D. C. Experimental design and the relative sensitivity of BOLD and perfusion fMRI. *Neuroimage* **15**, 488–500 (2002).
9. Macé, E. *et al.* Functional ultrasound imaging of the brain. *Nat. Methods* **8**, 662–664 (2011).
10. Rungta, R. L., Osmanski, B.-F., Boido, D., Tanter, M. & Chrapak, S. Light controls cerebral blood flow in naive animals. *Nat. Commun.* **8**, 14191 (2017).
11. Schlag, J. & Schlag-Rey, M. Evidence for a supplementary eye field. *J. Neurophysiol.* **57**, 179–200 (1987).
12. Tehovnik, E. J., Sommer, M. A., Chou, I. H., Slocum, W. M. & Schiller, P. H. Eye fields in the frontal lobes of primates. *Brain Res. Brain Res. Rev.* **32**, 413–448 (2000).
13. Chen, L. L. & Wise, S. P. Neuronal activity in the supplementary eye field during acquisition of conditional oculomotor associations. *J. Neurophysiol.* **73**, 1101–1121 (1995).
14. al, A. N. Reward-predicting and reward-detecting neuronal activity in the primate supplementary eye field. - PubMed - NCBI.
15. Curtis, C. E., Cole, M. W., Rao, V. Y. & D'Esposito, M. Canceling planned action: an FMRI study of countermanding saccades. *Cereb. Cortex (New York, N.Y. 1991)* **15**, 1281–1289 (2005).
16. Stuphorn, V., Taylor, T. L. & Schall, J. D. Performance monitoring by the supplementary eye field. *Nature* **408**, 857–860 (2000).
17. Olson, C. R. & Gettner, S. N. Neuronal activity related to rule and conflict in macaque supplementary eye field. *Physiol. Behav.* **77**, 663–670 (2002).
18. Heinen, S. J. & Liu, M. Single-neuron activity in the dorsomedial frontal cortex during smooth-pursuit eye movements to predictable target motion. *Vis. Neurosci.* **14**, 853–865 (1997).
19. Missal, M. & Heinen, S. J. Facilitation of smooth pursuit initiation by electrical stimulation in the supplementary eye fields. *J. Neurophysiol.* **86**, 2413–2425 (2001).
20. Petit, L., Clark, V. P., Ingeholm, J. & Haxby, J. V. Dissociation of saccade-related and pursuit-related activation in human frontal eye fields as revealed by fMRI. *J. Neurophysiol.* **77**, 3386–3390 (1997).
21. Hwang, K., Ghuman, A. S., Manoach, D. S., Jones, S. R. & Luna, B. Cortical neurodynamics of inhibitory control. *J. Neurosci. Off. J. Soc. Neurosci.* **34**, 9551–9561 (2014).
22. Schlag-Rey, M., Amador, N., Sanchez, H. & Schlag, J. Antisaccade performance predicted by neuronal activity in the supplementary eye field. *Nature* **390**, 398–401 (1997).
23. Hikosaka, O., Takikawa, Y. & Kawagoe, R. Role of the basal ganglia in the control of purposive saccadic eye movements. *Physiol. Rev.* **80**, 953–978 (2000).
24. Gaymard, B., Ploner, C. J., Rivaud-Péchéux, S. & Pierrot-Deseilligny, C. The frontal eye field is involved in spatial short-term memory but not in reflexive saccade inhibition. *Exp.*

- Brain Res.* **129**, 288–301 (1999).
25. Olson, C. R., Musil, S. Y. & Goldberg, M. E. Single neurons in posterior cingulate cortex of behaving macaque: eye movement signals. *J. Neurophysiol.* **76**, 3285–3300 (1996).
  26. Mort, D. J. *et al.* Differential cortical activation during voluntary and reflexive saccades in man. *Neuroimage* **18**, 231–246 (2003).
  27. Ito, S., Stuphorn, V., Brown, J. W. & Schall, J. D. Performance Monitoring by the Anterior Cingulate Cortex During Saccade Countermanding. *Science (80- )*. **302**, 120–122 (2003).
  28. Mitz, A. R. & Godschalk, M. Eye-movement representation in the frontal lobe of rhesus monkeys. *Neurosci. Lett.* **106**, 157–162 (1989).
  29. Paus, T., Petrides, M., Evans, A. C. & Meyer, E. Role of the human anterior cingulate cortex in the control of oculomotor, manual, and speech responses: a positron emission tomography study. *J. Neurophysiol.* **70**, 453–469 (1993).
  30. Montaldo, G., Tanter, M., Bercoff, J., Benech, N. & Fink, M. Coherent plane-wave compounding for very high frame rate ultrasonography and transient elastography. *IEEE Trans. Ultrason. Ferroelectr. Freq. Control* **56**, 489–506 (2009).
  31. Demené, C. *et al.* Spatiotemporal Clutter Filtering of Ultrafast Ultrasound Data Highly Increases Doppler and fUltrasound Sensitivity. *IEEE Trans. Med. Imaging* **34**, 2271–2285 (2015).
  32. Birn, R. M., Diamond, J. B., Smith, M. A. & Bandettini, P. A. Separating respiratory-variation related fluctuations from neuronal-activity-related fluctuations in fMRI. *Neuroimage* **29**, 54–66 (2006).
  33. Lund, T. E., Madsen, K. H., Sidaros, K., Luo, W. & Nichols, T. E. Non-white noise in fMRI: does modelling have an impact? *Neuroimage* **29**, 54–66 (2006).
  34. Biswal, B., Yetkin, F., Haughton, V. & Hyde, J. Functional connectivity in the motor cortex of resting human brain using echo-planar MRI. *Magn. Reson. Med.* **34**, 537–541 (1995).
  35. Lowe, M. J., Mock, B. J. & Sorenson, J. A. Functional connectivity in single and multislice echoplanar imaging using resting-state fluctuations. *Neuroimage* **7**, 119–132 (1998).
  36. Kiviniemi, V., Kantola, J. H., Jauhiainen, J., Hyvarinen, A. & Tervonen, O. Independent component analysis of nondeterministic fMRI signal sources. *Neuroimage* **19**, 253–260 (2003).
  37. Macey, P. M., Macey, K. E., Kumar, R. & Harper, R. M. A method for the removal of global effects from fMRI time series. *Neuroimage* **22**, 360–366 (2004).
  38. Huettel, S. . Event-related fMRI in cognition. *Neuroimage* **62**, 1152–1156 (2012).
  39. Mitra, A., Snyder, A. Z., Hacker, C. D. & Raichle, M. E. Lag structure in resting-state fMRI. *J Neurophysiol* **111**, 2374–2391 (2014).
  40. Dumoulin, S. O. Layers of Neuroscience. *Neuron* **96**, 1205–1206 (2017).
  41. Huber, L. *et al.* High-Resolution CBV-fMRI Allows Mapping of Laminar Activity and Connectivity of Cortical Input and Output in Human M1. *Neuron* **96**, 1253–1263.e7 (2017).
  42. O’Herron, P. *et al.* Neural correlates of single-vessel haemodynamic responses in vivo. *Nature* **534**, 372–382 (2016).
  43. Osmanski, B.-F., Pezet, S., Ricobaraza, A., Lenkei, Z. & Tanter, M. Functional Ultrasound Imaging of Intrinsic Connectivity in the Living Rat Brain with High Spatiotemporal Resolution. *Nat. Commun.* **in press**, (2014).
  44. Urban, A. *et al.* Chronic assessment of cerebral hemodynamics during rat forepaw electrical stimulation using functional ultrasound imaging. *Neuroimage* **101**, 138–149 (2014).
  45. Bimbard, C. *et al.* Multi-scale mapping along the auditory hierarchy using high-resolution functional UltraSound in the awake ferret. *Elife* **7**, e35028 (2018).
  46. Imbault, M., Chauvet, D., Gennisson, J.-L., Capelle, L. & Tanter, M. Intraoperative functional ultrasound imaging of human brain activity. *Sci. Rep.* **7**, 7304 (2017).
  47. Friston, K. Causal modelling and brain connectivity in functional magnetic resonance imaging. *PLoS Biol.* **7**, e33 (2009).
  48. Friston, K. Dynamic causal modeling and Granger causality. Comments on: The identification of interacting networks in the brain using fMRI: model selection, causality and deconvolution. *Neuroimage* **58**, 303–305 (2011).
  49. Friston, K., Moran, R. & Seth, A. K. Analysing connectivity with Granger causality and

- dynamic causal modelling. *Curr. Opin. Neurobiol.* **23**, 172–178 (2013).
50. Raichle, M. E. The restless brain. *Brain Connect.* **1**, 3–12 (2011).
  51. Mohajerani, M. H., McVea, D. A., Fingas, M. & Murphy, T. H. Mirrored bilateral slow-wave cortical activity within local circuits revealed by fast bihemispheric voltage-sensitive dye imaging in anesthetized and awake mice. *J. Neurosci.* **30**, 3745–3751 (2010).
  52. Mohajerani, M. H. *et al.* Spontaneous cortical activity alternates between motifs defined by regional axonal projections. *Nat. Neurosci.* **16**, 1426–1435 (2013).
  53. Massimini, M., Huber, R., Ferrarelli, F., Hill, S. & Tononi, G. The sleep slow oscillation as a traveling wave. *J. Neurosci.* **24**, 6862–6870 (2004).
  54. Murphy, M. *et al.* Source modeling sleep slow waves. *PNAS* **106**, 1608–1613 (2009).
  55. Hopfinger, J. B., Buonocore, M. H. & Mangun, G. R. The neural mechanisms of top-down attentional control. *Nat. Neurosci.* **3**, 284–291 (2000).
  56. Miller, E. K. & Cohen, J. D. An integrative theory of prefrontal cortex function. *Annu. Rev. Neurosci.* **24**, 167–202 (2001).
  57. Ninomiya, T., Dougherty, K., Godlove, D. C., Schall, J. D. & Maier, A. Microcircuitry of agranular frontal cortex: contrasting laminar connectivity between occipital and frontal areas. *J. Neurophysiol.* **113**, 3242–3255 (2015).

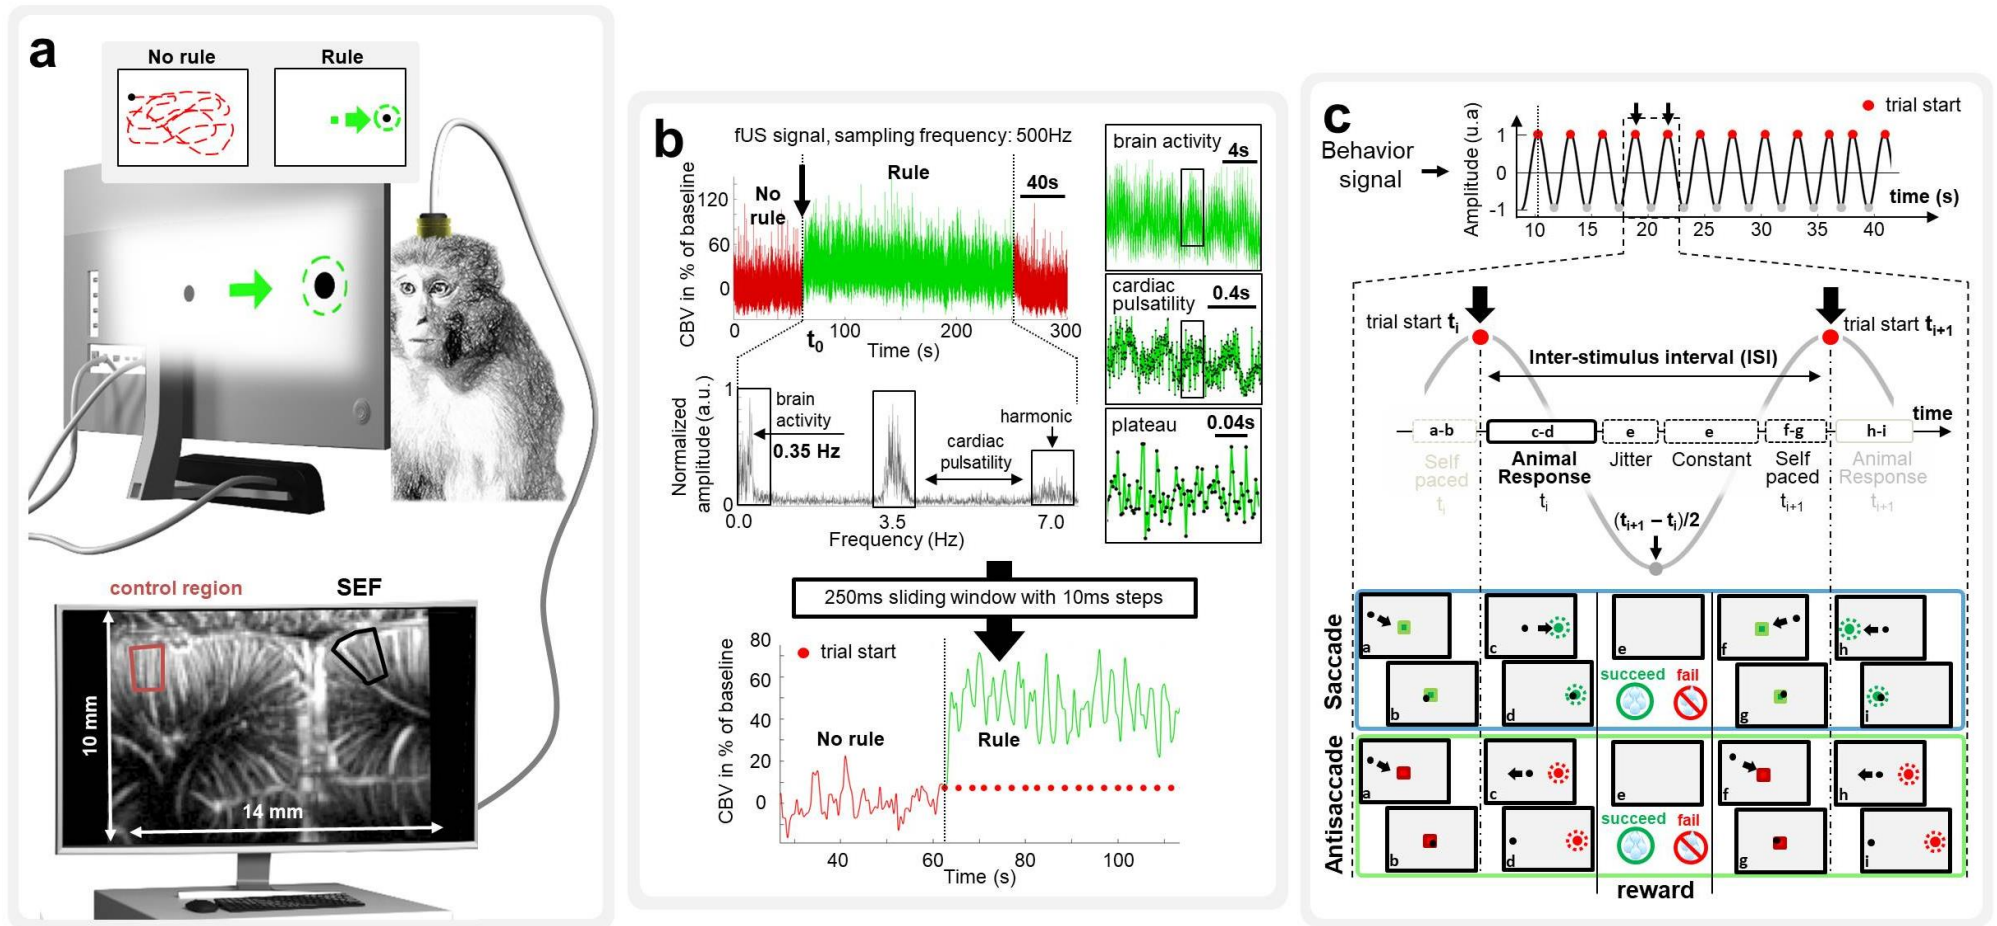

Figure 1: The high sensitivity to cerebral blood volume (CBV) changes in fUS (functional ultrasound) imaging enable the single trial detection of supplementary eye field (SEF) activation during visual tasks. The animals performed in a row with baseline (rest phase), fixation, saccade and antisaccade trials while CBV changes were recorded in fUS with a FOV of 10x14 mm (a). Panel b shows the fUS signal recorded at a sampling frequency of 500 Hz the SEF region; below is the associated spectrum (fast Fourier transform) of the SEF signal during the visual task. Peaks frequency observed at 0.35 Hz and 3.5 Hz are related to brain activity and cardiac pulsatility ( $\sim 210$  bpm), respectively (7 Hz is a harmonic frequency of cardiac pulsatility). To obtain a cleaner signal, cardiac pulsatility was first removed with a cutoff filter, and then a 250ms sliding window with a time increment of 10 ms was applied in each pixel of the image. (c) Behavior signal consists of a sinusoid for which each period was defined by the time between trial start  $t_i$  and the following trial start  $t_{i+1}$ . Jitter and constant time were similar for all type of task; the only significant variation between visual tasks was the animal response time (RT). Each visual task was initialized by the animal (a-b), for saccade he has to hit the cue (c-d) whereas for antisaccade he has to hit the opposite side where the cue appeared (c-d) and finally for the fixation task (not represented in the figure) he has to keep its eye's position on the initial cue. Depending on the result, the animal received a reward (e) and he then could initialize a new trial sequence (f-g-h-i).



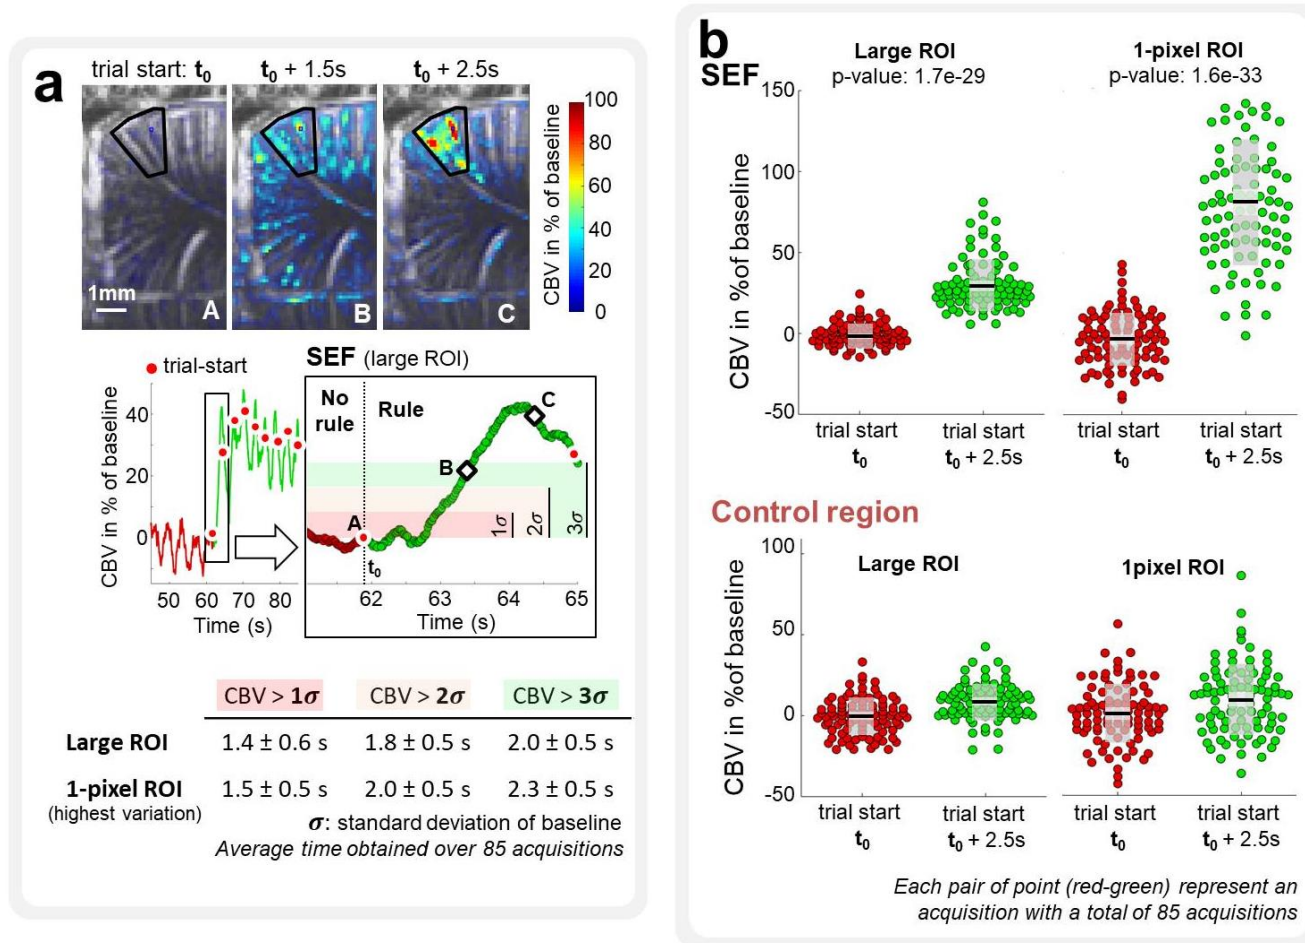

Figure 2: As shown in panel **a**, the start of the first visual cue induced a strong CBV variation of  $\sim 40\%$  in the SEF reached in 2.5 s (quantified in a large ROI delineated by a black line,  $\sim 240$  pixels), and the CBV was already 2-fold greater than the standard deviation of baseline ( $\sigma$ ) after 1.5 s. Whether CBV was quantified in a large ROI or in a 1-pixel ROI (pixel chosen with the highest variation of CBV over the experiment), the delay to observe CBV above a certain range of  $\sigma$  was similar (average over 85 acquisitions). As presented in the panel **b**, the CBV variation between the beginning of the first trial and 2.5 s after was highly significant in the SEF (in the large and 1-pixel ROI), whereas no difference was observed in the control region.

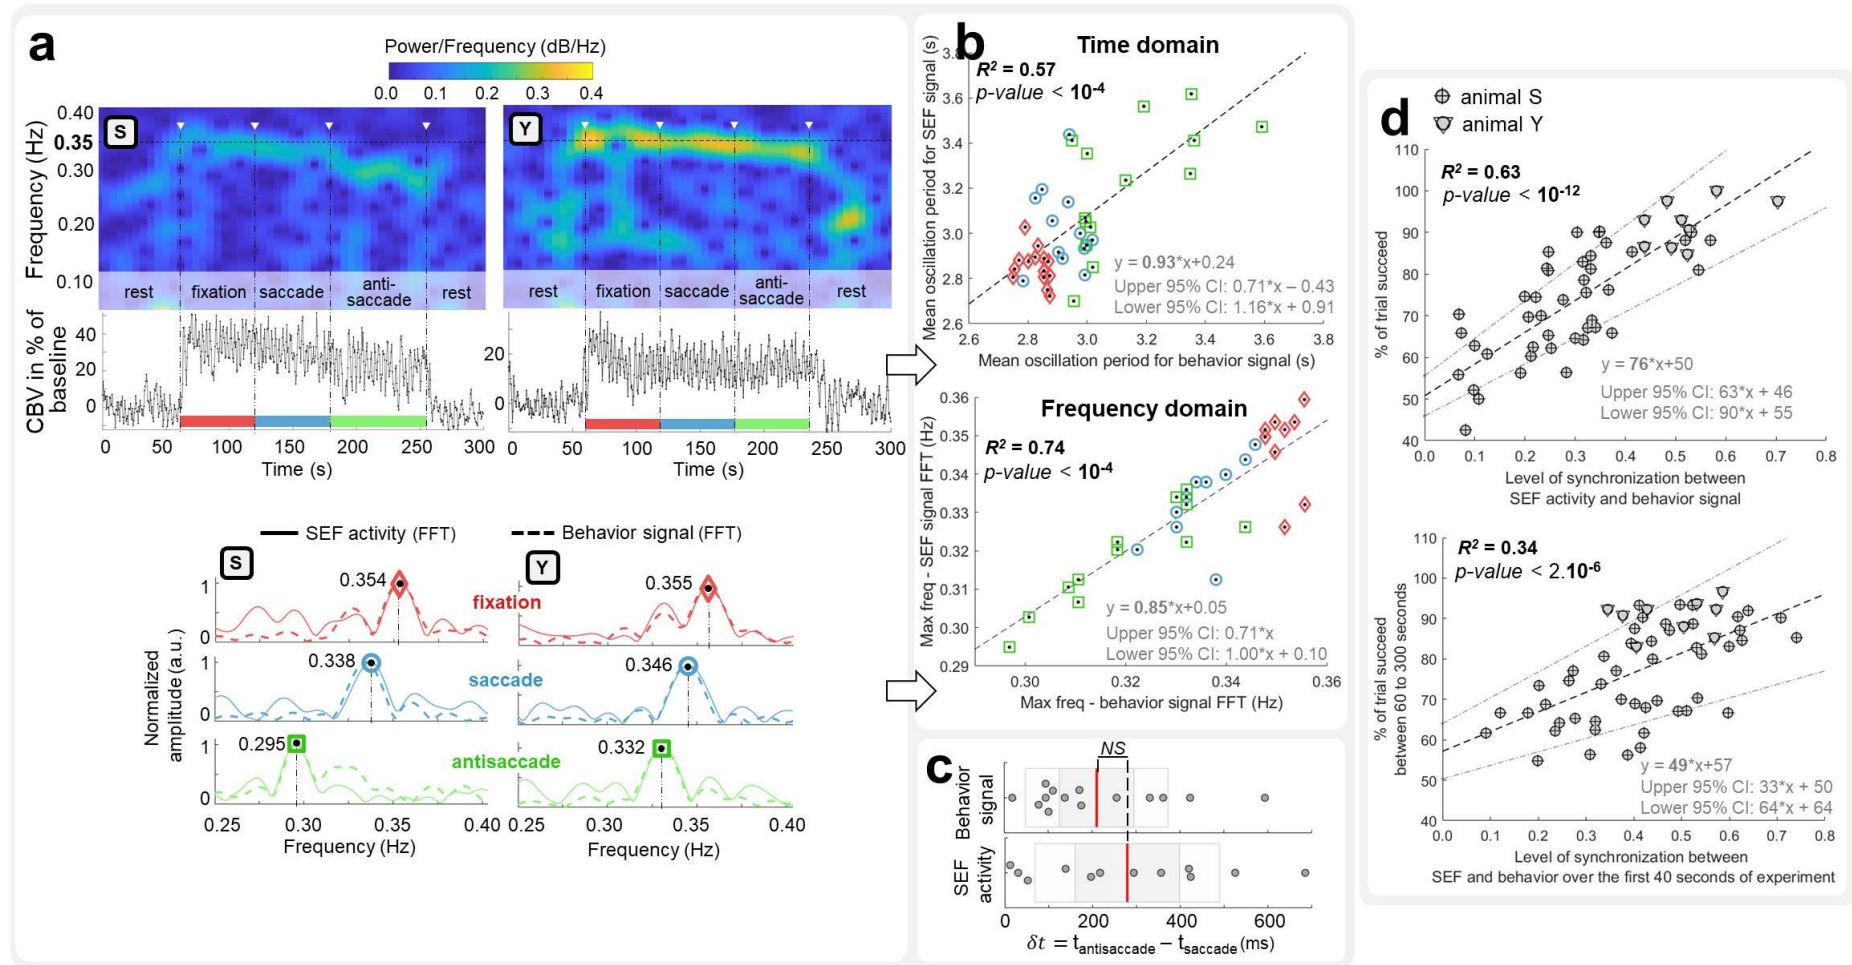

Figure 3: fUS imaging is able to differentiate the task response times for fixation/saccade and antisaccade using frequency analysis of CBV changes in the SEF as well as the success rate. Panel **a** presents an example of two spectrograms related to CBV oscillations in the SEF (large ROI, ~240 pixels) for both animals (S and Y). During the visual task, the CBV in the SEF oscillates around 0.35 Hz and decreases during the rest phase. For each visual task, the fast Fourier transform of the temporal signal in the SEF and the related behavioral signal were plotted and superimposed. A match in peak frequency between the SEF signal and behavior signal indicates synchronization between brain activity and behavior. The behavior signal was created by plotting a sinusoid for which each period was defined by the delay between trial-start  $t_i$  and trial-start  $t_{i+1}$ , and as shown in the supplementary material, this signal contains the response time of animals (see Fig. 4b in Supplementary Material). (c) fUS imaging permitted the assessment of the subtle changes in task response time between the saccade and antisaccade experiments ( $\delta t = t_{\text{antisacc}} - t_{\text{sacc}} = 280 \pm 210$  ms) in agreement with behavior data ( $\delta t = 210 \pm 160$  ms, no significant difference,  $p = 0.36$ ) using a limited set of 20 successive trials. As presented in panel **b**, whether in the time domain or frequency domain, there was a set of 13 acquisitions for which a significant correlation between CBV oscillations in the SEF and a related behavior signal was highlighted. The correlation (level of synchronization) between the SEF signal and behavior signal has been plotted for all acquisitions and was significantly correlated to the success rate of the animal (**d**). It was even possible to predict the success rate of the animal only by considering the brain-behavior synchronization over the first 40 seconds of the experiment (**d**).



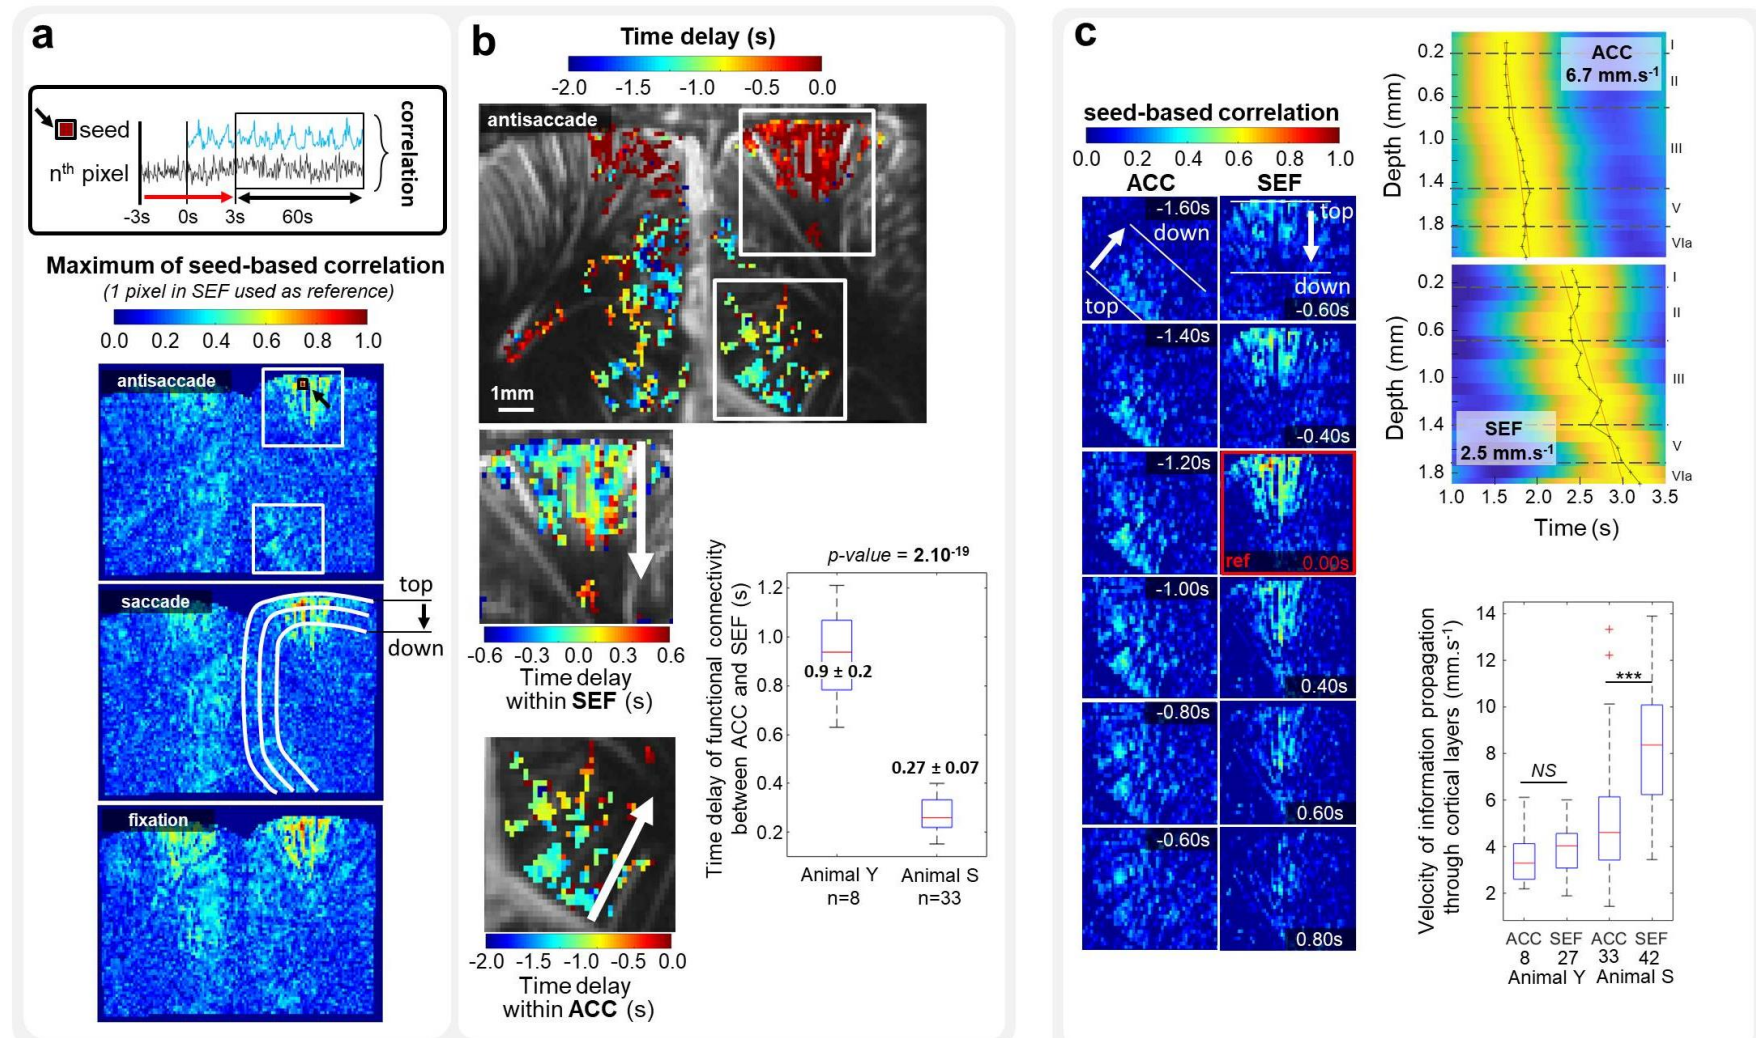

Figure 4: fUS permits access to the directional functional connectivity of cortical layers. Time delays between and within the ACC and SEF were extracted from a seed-based correlation map for pixels with a correlation above 0.3 (a reference pixel in the SEF was chosen based on the highest variation in CBV over the experiment) (a). The average time delay of information propagation between the ACC and SEF was  $1.0 \pm 0.3$  s and  $0.26 \pm 0.08$  s for animals Y and S, respectively (b). Thanks to the temporal resolution of fUS (10 ms), it was possible to track the propagation of the correlated information within cortical layers and to compute the propagation velocity (c). Successive screenshots revealed a propagation of information first in the ACC and then in the SEF. The reference time (screenshot with red borders) corresponds to the time when the auto-correlation coefficient of the 1-pixel SEF is 1. The average velocity of information propagation through the cortical layers of the ACC and SEF was, respectively,  $3.6 \pm 1.3$  mm.s<sup>-1</sup> and  $4.0 \pm 1.2$  mm.s<sup>-1</sup> for animal Y and  $5.2 \pm 2.6$  mm.s<sup>-1</sup> and  $8.4 \pm 2.6$  mm.s<sup>-1</sup> for animal S. NS means non-significant. \*\*\* indicates a  $p\text{-value} < 5.10^{-4}$  for a two-sample t-test. Digits on the x-axis of the boxplot indicate the number of measurements. Cortical layers were delineated based on reference<sup>56</sup>.

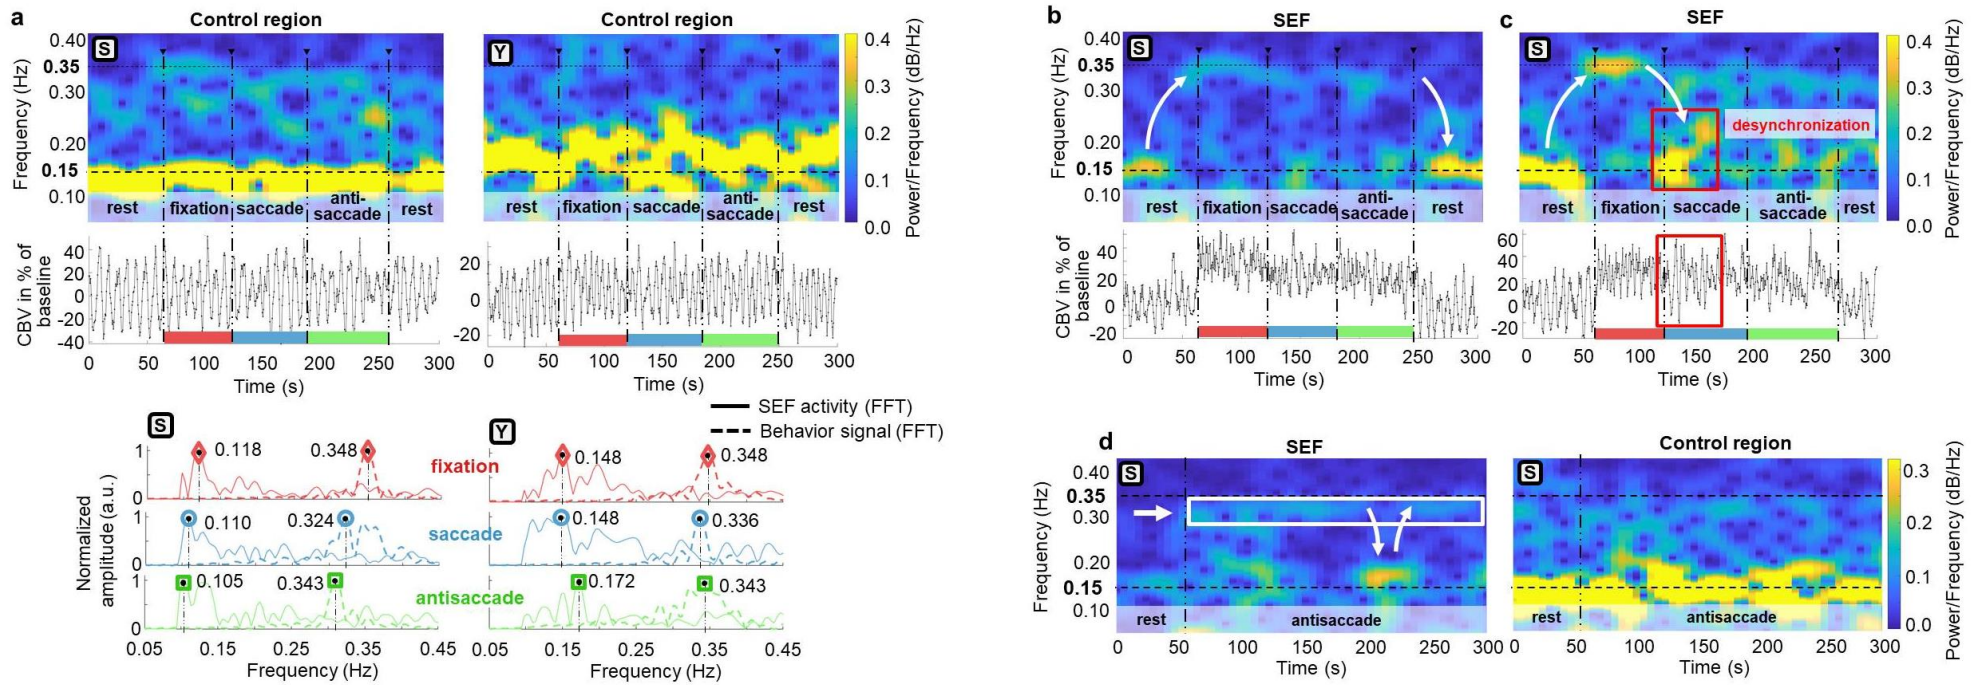

Figure 4: **(a)** For both animals, CBV oscillations in the control region, in a range between 0.1 and 0.2 Hz, were not related to behavior activity (~0.35 Hz). **(b)** In some acquisitions, when entering in the working phase, CBV oscillations in the SEF shifted from 0.15 Hz to 0.35 Hz and came back to the initial state at 0.15 Hz after stopping visual tasks. **(c)** An example of the desynchronization of SEF activity during the visual task. **(d)** Spectrograms in SEF and control region during experiment with only one type of visual task (antisaccade).



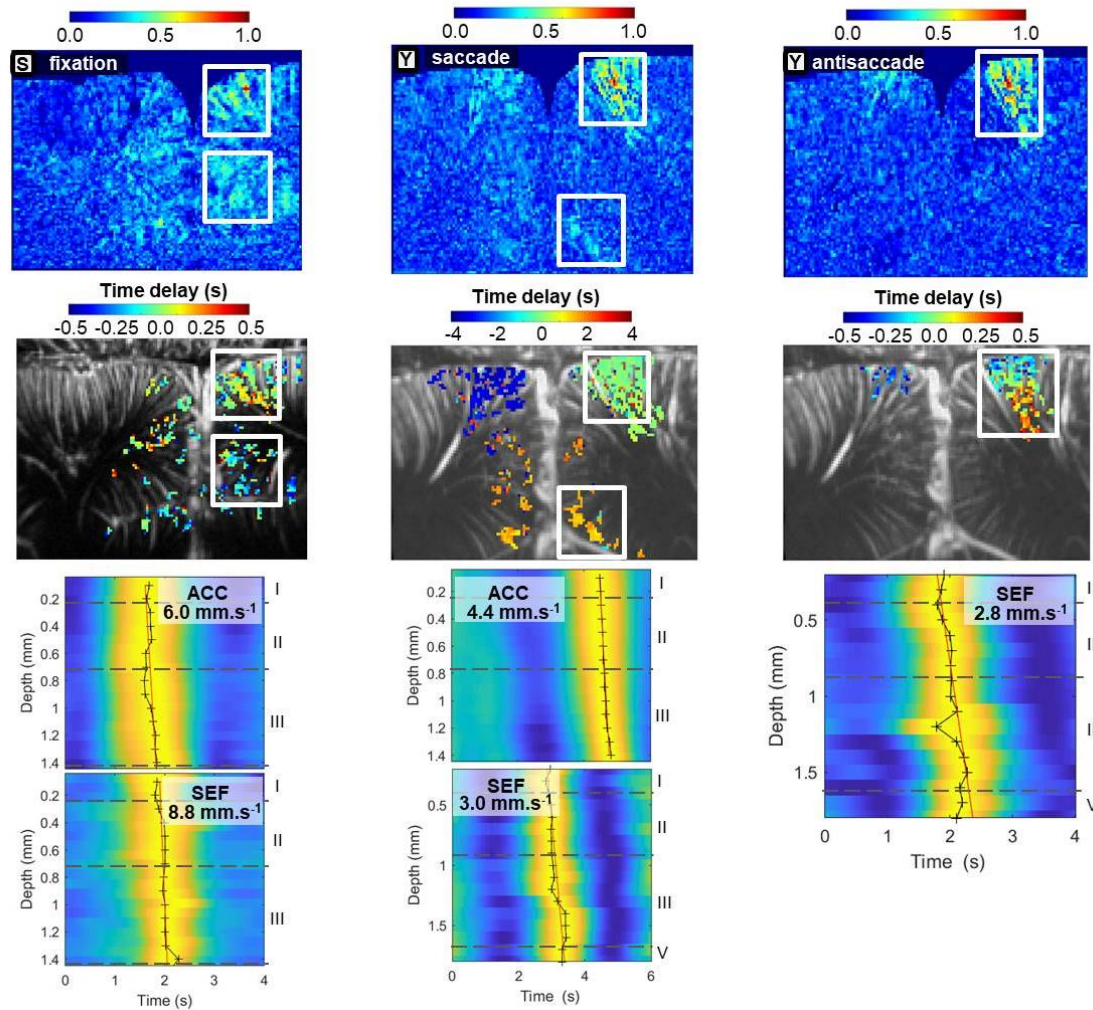

Figure 5: Maximum of seed-based correlation maps with related time delays between cortical regions of interest (ACC, SEF) and the propagation speed of SEF-correlated information for 3 different cases. (a) Configuration found for nearly every acquisition for animal S. SEF-correlated information goes through the ACC before reaching the SEF. (b) An example for animal Y, for which the SEF-correlated information passes through the SEF before reaching the ACC. (c) In some cases, no SEF-correlated information was detected in the ACC. Cortical layers were delineated based on reference<sup>37</sup>.

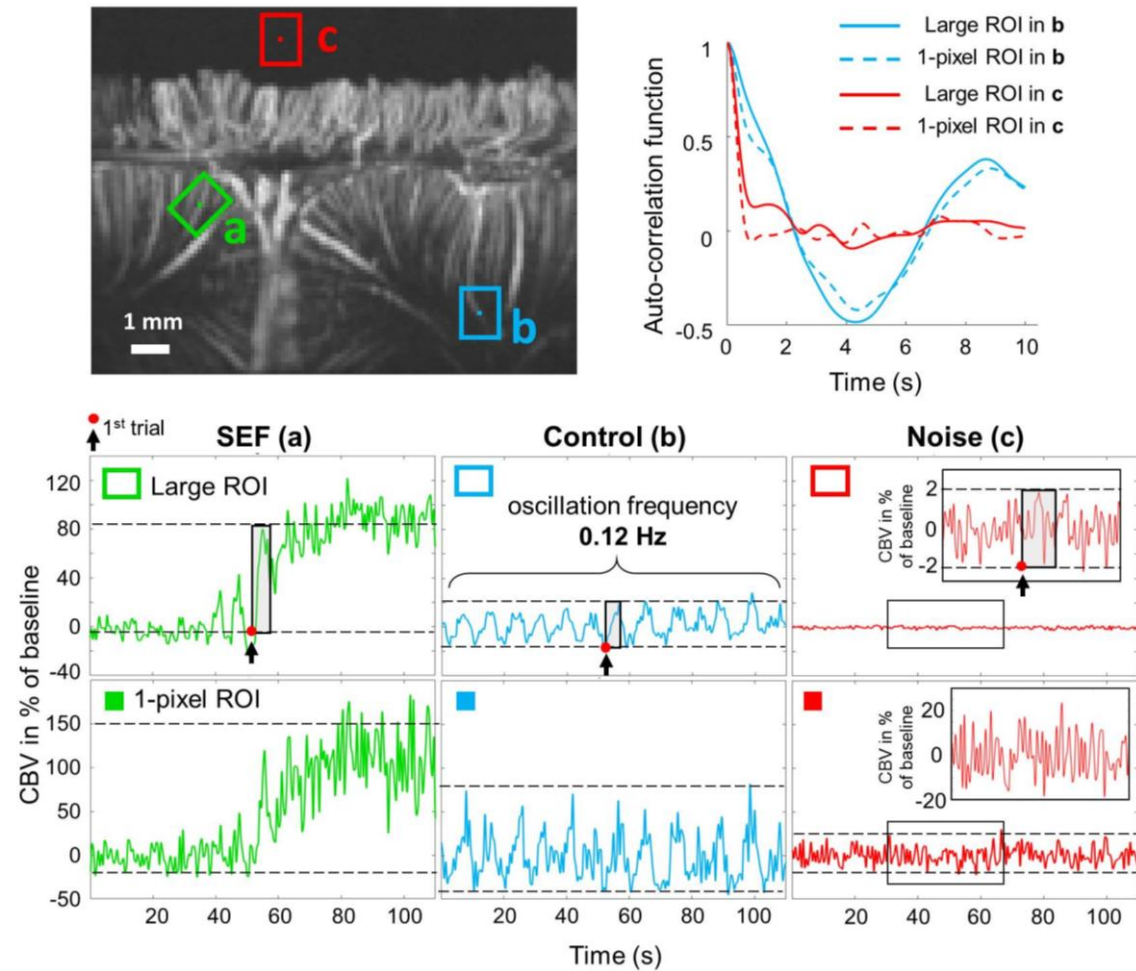

Figure 6: High sensitivity of fUS imaging. In a single Doppler movie it was possible to either extract CBV fluctuations in SEF (ROI a) related to visual activity, spontaneous coherent oscillations in control region (ROI b) and noise signal outside of the brain (ROI c). The auto-correlation function revealed a typical white gaussian noise concerning signal outside of the brain and clear coherent 0.12Hz CBV oscillations within control region.

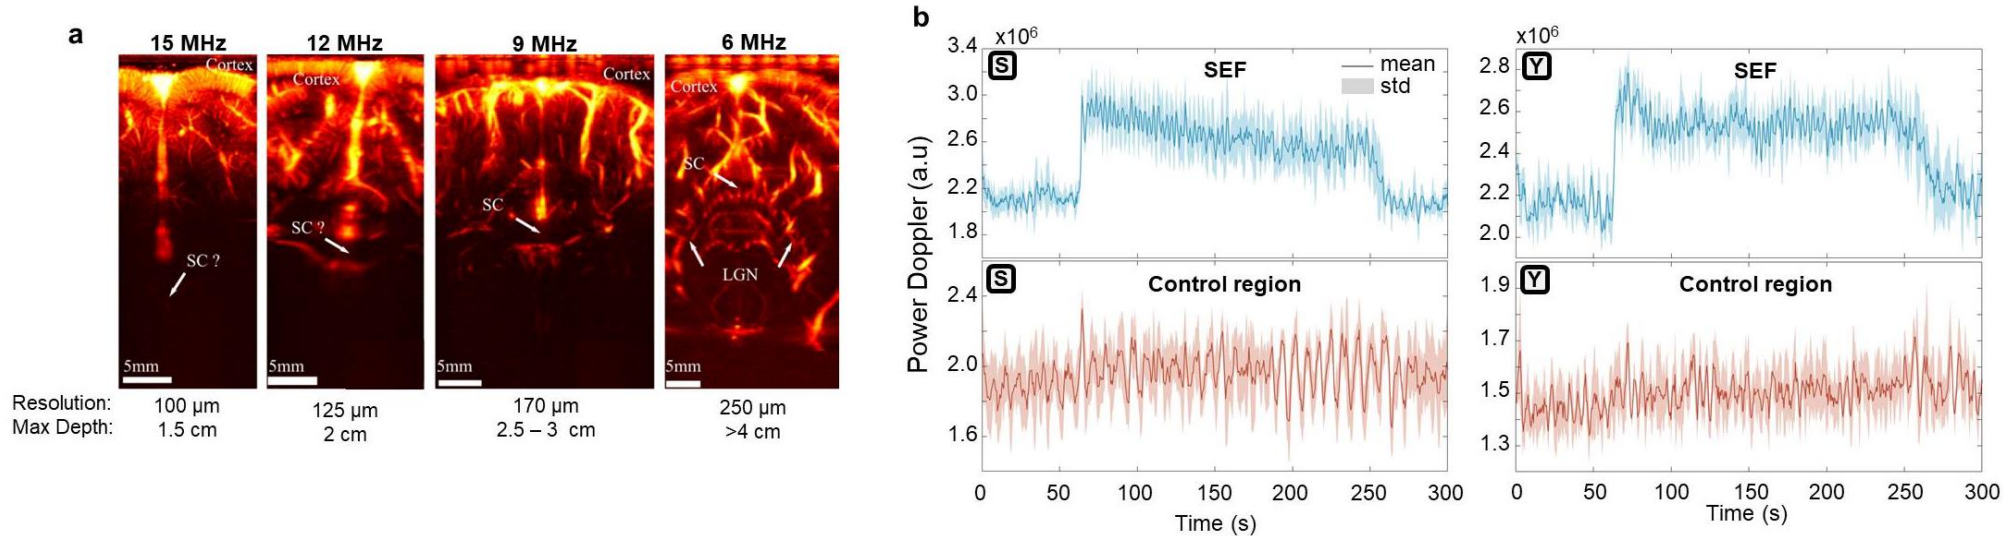

Figure 7: **(a)** fUS imaging of the same visual cortex of a non-human primate seen with a different ultrasonic probe used at their central frequency. The probe used for the present study was the one at 15 MHz. LGN = lateral geniculate nucleus, SC = superior colliculus. **(b)** Average and standard deviation of five consecutive acquisitions for both animals in the SEF and control region for large ROIs (>200 pixels).
